# Supplementary material
Source: PubMed Central journal article supplement (PMC11385965)
Supplement: PBI-19-2442-s001.pdf [file PBI-19-2442-s001.pdf]

## Legends for Supporting Information

**Supplementary figure S1:** Design and efficiency of guide RNAs for *CiGAS*.

(a) Alignment of the *CiGAS* exon 4 sequences with differences shaded. The positions of the five sgRNAs are underlined and the PAM sequences of each are labelled and shown in bold. (b) Quantification of the indels generated by each sgRNA.

**Supplementary figure S2:** Sequence of the cassette carrying three guide RNAs.

The Arabidopsis U6 promoter is shown in italics, the tRNA sequences are in bold and the guide RNAs are underlined and are in order (sgRNA1, sgRNA 1.1, sgRNA 1.2).

**Supplementary figure S3:** Mutations in the *CiGAS* genes of regenerated chicory plants. The indel mutations present in all of the lines analyzed for STL content are shown. For each gene the target site is shown underlined with the mutations present in each allele. Alleles without indels are indicated as wild type (WT). Inserted nucleotides are underlined.

**Supplementary figure S4.** Molar mass distributions of inulin (in 0.1 M NaOH) against Pullulan standards for chicory lines PL4, PL6 and RN12.

**Supplementary figure S5:** Comparison of mass spectrum of a.) authentic squalene standard to b.) the mass spectrum of squalene produced by chicory.

**Supplementary figure S6:** Correlation of radical scavenging activity (IC50 values) and total content of sesquiterpene lactones STLs (A and C) and phenolic compounds PCs (B and D) in chicory lines PL4, PL6 and RN12. Leaf samples (A, B) and root samples (C, D).

**Supplementary table S1:** Primers used for genotyping.

Supplementary figure S1

a.)

|        |                                                                                       |        |
|--------|---------------------------------------------------------------------------------------|--------|
|        | sgRNA1                                                                                | sgRNA2 |
| GAS-S1 | GTGGTGAAGGATATGAGGTTCCAGGAACTACT <b>CCT</b> TACATAAGGGATAGAGT <b>CCA</b> GAGATT       |        |
| GAS-S2 | GTGGTGAAGGATATGAGGTTCCAGGAACTACTCCTTACATAAGGGATAGAGTACCAGAGATT                        |        |
| GAS-S3 | GTGGTGAAGGATATGAGGTTCCAAGAACTACTCCTTATAAGGGATAGAGTACC <b>CG</b> GAGAT <b>C</b>        |        |
| GAS-L  | GTGGTGAAGGATATGCAATTCCAACAATCCGTCCTTACATAAGAGATAGAGTACC <b>GG</b> GAGATA              |        |
|        | sgRNA3                                                                                | sgRNA5 |
| GAS-S1 | <u>TACTTATGGATATTGGGATTGTACTTTGAG<b>CCT</b>CGTTACTCCTTGGCACGAATCATCG<b>CCA</b>CAA</u> |        |
| GAS-S2 | TACTTATGGATATTGGGATTGTACTTTGAGCCTCGTTACTCCTTGGCACGAATCATCGCCACAA                      |        |
| GAS-S3 | TACTTATGGATATTAGGATTGTACTTTGAGCCTCGTTACTCCTTGGCACGAATCATCGCCACAA                      |        |
| GAS-L  | TACCTATGGATTTTGGGGTTATATTTTCGAGCCGTATTACTCTCGGGCACGTATCATAGCCACTA                     |        |
|        | sgRNA4                                                                                |        |
| GAS-S1 | <u>AAATAACATTGTTTCTGG<b>TGG</b>TGCTAGATGACACATATGATGCGTACGCTACCATTGAAGAGAT</u>        |        |
| GAS-S2 | AAATTACATTGTTCTGGTGGTCTAGATGACACATATGATGCATACGCTACCATTGAAGAGAT                        |        |
| GAS-S3 | AAATTACATTGTTTGGTGGTCTAGACGACACATATGATGCATGCTACAATTGAAGAAAT                           |        |
| GAS-L  | AAATCACGTTGTTCTGGTGGTTTTGGACGATACATATGACGCGTATGCTACAATTGACGAGAT                       |        |
| GAS-S1 | TCGACTTCTAACAGATGCCATAAACAG                                                           |        |
| GAS-S2 | TCGACTTCTGACAGATGCCATAAACAG                                                           |        |
| GAS-S3 | TCGTCCTTTAACTGATGCCATAAATAG                                                           |        |
| GAS-L  | CCGATCGATCACAGATGCGATTAAATAG                                                          |        |

b.)

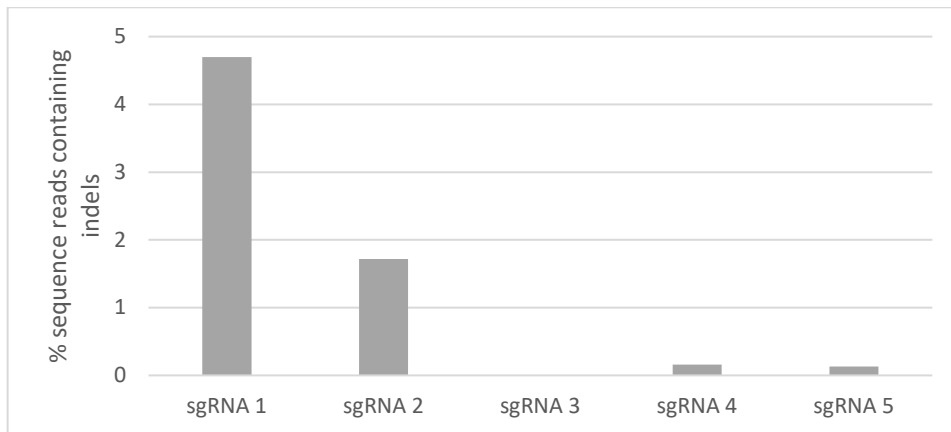

Supplementary figure S2

*GGAGTGATCAAAAAGTCCCACATCGATCAGGTGATATATAGCAGCTTAGTTTATATAATGATAGAGTCGAC*  
*ATAGCGATTGAACAAAGCACCAGTGGTCTAGTGGTAGAATAGTACCCTGCCACGGTACAGACCCGGGTTC*  
***GATTCCCGGCTGGTGCA****GGTACTCTATCCCTTATGTAGTTTTAGAGCTAGAAATAGCAAGTTAAAATAAG*  
*GCTAGTCCGTTATCAACTTGAAAAAGTGGCACCGAGTCGGTGCAACAAAGCACCAGTGGTCTAGTGGTAG*  
***AATAGTACCCTGCCACGGTACAGACCCGGGTTCGATTCCCGGCTGGTGCA****GGTACTCTATCCCTTATATA*  
*GTTTTAGAGCTAGAAATAGCAAGTTAAAATAAGGCTAGTCCGTTATCAACTTGAAAAAGTGGCACCGAGT*  
*CGGTGCAACAAAGCACCAGTGGTCTAGTGGTAGAATAGTACCCTGCCACGGTACAGACCCGGGTTCGATT*  
***CCCGGCTGGTGCA****GGTACTCTATCTCTTATGTAGTTTTAGAGCTAGAAATAGCAAGTTAAAATAAGGCTA*  
*GTCCGTTATCAACTTGAAAAAGTGGCACCGAGTCGGTGCTTTTTTTTT*

## Supplementary figure S3

### Mutations in the GAS genes of regenerated chicory plants

| RN4 GAS-S1 (-5/-11)            | RN4 GAS-S2 (-9/-9)             | RN4 GAS-S3 (-7/ins)            | RN4 GAS-L                      |
|--------------------------------|--------------------------------|--------------------------------|--------------------------------|
| <u>GGTACTCTATCCCTTATGTAAGG</u> | <u>GGTACTCTATCCCTTATGTAAGG</u> | <u>GGTACTCTATCCCTTATATAAGG</u> | <u>GGTACTCTATCTCTTATGTAAGG</u> |
| GGTACTCTATC-----TGTAAGG        | GGTACTC-----TGTAAGG            | GGTACTCTAT-----ATAAGG          | GGTACTCTATCTCTTATGTAAGG        |
| GGTACTC-----TAAGG              | GGTACTC-----TGTAAGG            | <b>Insertion</b>               | GGTACTCTATCTCTTATGTAAGG        |
| <br>                           |                                |                                |                                |
| RN5 GAS-S1 (-12/-9)            | RN5 GAS-S2 (WT )               | RN5 GAS-S3 (WT )               | RN5 GAS-L (WT)                 |
| <u>GGTACTCTATCCCTTATGTAAGG</u> | <u>GGTACTCTATCCCTTATGTAAGG</u> | <u>GGTACTCTATCCCTTATATAAGG</u> | <u>GGTACTCTATCTCTTATGTAAGG</u> |
| GG-----TATGTAAGG               | GGTACTCTATCCCTTATGTAAGG        | GGTACTCTATCCCTTATATAAGG        | GGTACTCTATCTCTTATGTAAGG        |
| GGTACTC-----TGTAAGG            | GGTACTCTATCCCTTATGTAAGG        | GGTACTCTATCCCTTATATAAGG        | GGTACTCTATCTCTTATGTAAGG        |
| <br>                           |                                |                                |                                |
| RN6 GAS-S1 (-4/-19)            | RN6 GAS-S2 (WT)                | RN6 GAS-S3 (-4/WT)             | RN6 GAS-L (WT)                 |
| <u>GGTACTCTATCCCTTATGTAAGG</u> | <u>GGTACTCTATCCCTTATGTAAGG</u> | <u>GGTACTCTATCCCTTATATAAGG</u> | <u>GGTACTCTATCTCTTATGTAAGG</u> |
| GGTACTCTATCC----TGTAAGG        | GGTACTCTATCCCTTATGTAAGG        | GGTACTCTATCCC---ATAAGG         | GGTACTCTATCTCTTATGTAAGG        |
| -----TAAGG                     | GGTACTCTATCCCTTATGTAAGG        | GGTACTCTATCCCTTATATAAGG        | GGTACTCTATCTCTTATGTAAGG        |
| <br>                           |                                |                                |                                |
| RN7 GAS-S1 (-4/-17)            | RN7 GAS-S2 (-11/-11)           | RN7 GAS-S3 (-2/-7)             | RN7 GAS-L (WT)                 |
| <u>GGTACTCTATCCCTTATGTAAGG</u> | <u>GGTACTCTATCCCTTATGTAAGG</u> | <u>GGTACTCTATCCCTTATATAAGG</u> | <u>GGTACTCTATCTCTTATGTAAGG</u> |
| GGTACTCTATCC----TGTAAGG        | GGTACTCT-----AAGG              | GGTACTCTATCCCTTA--TAAGG        | GGTACTCTATCTCTTATGTAAGG        |
| GGT-----AAGG                   | GGTACTCT-----AAGG              | GGTACTCTAT-----ATAAGG          | GGTACTCTATCTCTTATGTAAGG        |
| <br>                           |                                |                                |                                |
| RN8 GAS-S1 (-7/-14)            | RN8 GAS-S2 (-10/-13)           | RN8 GAS-S3 (-2/WT)             | RN8 GAS-L (WT)                 |
| <u>GGTACTCTATCCCTTATGTAAGG</u> | <u>GGTACTCTATCCCTTATGTAAGG</u> | <u>GGTACTCTATCCCTTATATAAGG</u> | <u>GGTACTCTATCTCTTATGTAAGG</u> |
| GGTACTC-----TATGTAAGG          | GGTACTCTAT-----AAGG            | GGTACTCTATCCCT--TATAAGG        | GGTACTCTATCTCTTATGTAAGG        |
| GG-----TGTAAGG                 | GGT-----TGTAAGG                | GGTACTCTATCCCTTATATAAGG        | GGTACTCTATCTCTTATGTAAGG        |
| <br>                           |                                |                                |                                |
| RN9 GAS-S1 (-9/-9)             | RN9 GAS-S2 (-10/WT)            | RN9 GAS-S3 (-4/-4)             | RN4 GAS-L (WT)                 |
| <u>GGTACTCTATCCCTTATGTAAGG</u> | <u>GGTACTCTATCCCTTATGTAAGG</u> | <u>GGTACTCTATCCCTTATATAAGG</u> | <u>GGTACTCTATCTCTTATGTAAGG</u> |
| GGTACTCTA-----TAAGG            | GGTACTC-----GTAAGG             | GGTACTCTATCCC---ATAAGG         | GGTACTCTATCTCTTATGTAAGG        |
| GGTACTCTA-----TAAGG            | GGTACTCTATCCCTTATGTAAGG        | GGTACTCTATCCC---ATAAGG         | GGTACTCTATCTCTTATGTAAGG        |

RN10 GAS-S1 (-3/-5)      RN10 GAS-S2 (-6/-3)      RN10 GAS-S3 (-7/WT)      RN10 GAS-L (WT)

GGTACTCTATCCCTTATGTAAGG    GGTACTCTATCCCTTATGTAAGG    GGTACTCTATCCCTTATATAAGG    GGTACTCTATCTCTTATGTAAGG  
GGTACTCTATCCC---TGTAAGG    GGTACTCTAT-----TGTAAGG    GGTACTC-----TATATAAGG    GGTACTCTATCTCTTATGTAAGG  
GGTACTCTATCC-----GTAAGG    GGTACTCTATCCC---TGTAAGG    GGTACTCTATCCCTTATATAAGG    GGTACTCTATCTCTTATGTAAGG

RN11 GAS-S1 (-7/-7)      RN11 GAS-S2 (-5/-5)      RN11 GAS-S3 (-2/-2)      RN11 GAS-L (WT)

GGTACTCTATCCCTTATGTAAGG    GGTACTCTATCCCTTATGTAAGG    GGTACTCTATCCCTTATATAAGG    GGTACTCTATCTCTTATGTAAGG  
GGTACTCTAT-----GTAAGG    GGTACTCTATC-----TGTAAGG    GGTACTCTATCCCT--TATAAGG    GGTACTCTATCTCTTATGTAAGG  
GGTACTCT-----ATGTAAGG    GGTACTCTATC-----TGTAAGG    GGTACTCTATCCCT--TATAAGG    GGTACTCTATCTCTTATGTAAGG

RN12 GAS-S1 (-4/-7)      RN12 GAS-S2 (+1/-7)      RN12 GAS-S3 (-7/-16)      RN12 GAS-L (WT)

GGTACTCTATCCCTTATGTAAGG    GGTACTCTATCCCTTATGTAAGG    GGTACTCTATCCCTTATATAAGG    GGTACTCTATCTCTTATGTAAGG  
GGTACTCTATCC---TGTAAGG    GGTACTCTATCCCTTATGTAAGG    GGTACTC-----TATATAAGG    GGTACTCTATCTCTTATGTAAGG  
GGTACTC-----TATGTAAGG    GGTACTC-----TATGTAAGG    GG-----TAAGG    GGTACTCTATCTCTTATGTAAGG

RN13 GAS-S1 (-11/-11)      RN13 GAS-S2 (-12/-6)      RN13 GAS-S3 (-9/-7)      RN13 GAS-L (WT)

GGTACTCTATCCCTTATGTAAGG    GGTACTCTATCCCTTATGTAAGG    GGTACTCTATCCCTTATATAAGG    GGTACTCTATCTCTTATGTAAGG  
GGTAC-----ATGTAAGG    GGTAC-----GTAAGG    GGTAC-----TATATAAGG    GGTACTCTATCTCTTATGTAAGG  
GGTACTC-----GTAAGG    GGTACTCTAT-----TGTAAGG    GGTACTC-----TATATAAGG    GGTACTCTATCTCTTATGTAAGG

RN14 GAS-S1 (-7/-7)      RN14 GAS-S2 (-9/-7)      RN14 GAS-S3 (-3/-3)      RN14 GAS-L (-11/WT)

GGTACTCTATCCCTTATGTAAGG    GGTACTCTATCCCTTATGTAAGG    GGTACTCTATCCCTTATATAAGG    GGTACTCTATCTCTTATGTAAGG  
GGTACTC-----TATGTAAGG    GGTACTC-----TGTAAGG    GGTACTCTATCCC---TATAAGG    GGTACTC-----TAAGG  
GGTACTC-----TATGTAAGG    GGTACTC-----TATGTAAGG    GGTACTCTATCCC---TATAAGG    GGTACTCTATCTCTTATGTAAGG

RN15 GAS-S1 (-16/WT)      RN15 GAS-S2 (WT)      RN15 GAS-S3 (-5/WT)      RN15 GAS-L (WT)

GGTACTCTATCCCTTATGTAAGG    GGTACTCTATCCCTTATGTAAGG    GGTACTCTATCCCTTATATAAGG    GGTACTCTATCTCTTATGTAAGG  
GGTACTCTATCCCTTATGTAAGG    GGTACTCTATCCCTTATGTAAGG    GGTACTCTATC-----TATAAGG    GGTACTCTATCTCTTATGTAAGG  
GGTACTCTAT-----    GGTACTCTATCCCTTATGTAAGG    GGTACTCTATCCCTTATATAAGG    GGTACTCTATCTCTTATGTAAGG

PL5 GAS-S1 (-9/-12)      PL5 GAS-S2 (WT)      PL5 GAS-S3 (-2/-9)      PL5 GAS-L (-6/-6)

GGTACTCTATCCCTTATGTAAGG    GGTACTCTATCCCTTATGTAAGG    GGTACTCTATCCCTTATATAAGG    GGTACTCTATCTCTTATGTAAGG  
GGTACTCTAT-----AAGG    GGTACTCTATCCCTTATGTAAGG    GGTACTCTATCCCTT--ATAAGG    GGTACTCTAT-----TGTAAGG  
GGTAC-----GTAAGG    GGTACTCTATCCCTTATGTAAGG    GGTACTCTAT-----AAGG    GGTACTCTAT-----TGTAAGG

**RN16 GAS-S1 (-2/-11)**

GGTACTCTATCCCTTATGTAAGG  
GGTACTCTATCCC--ATGTAAGG  
GGTACTC-----TAAGG

**RN16 GAS-S2 (-2/-11)**

GGTACTCTATCCCTTATGTAAGG  
GGTACTCTATCCC--ATGTAAGG  
GGTACTC-----TAAGG

**RN16 GAS-S3 (-9/-7)**

GGTACTCTATCCCTTATATAAGG  
GGTACTC-----TATATAAGG  
GGTACTC-----TATAAGG

**RN16 GAS-L (-7/-16)**

GGTACTCTATCTCTTATGTAAGG  
GGTACTC-----TATGTAAGG  
G-----GTAAGG

**RN17 GAS-S1 (-6/-5)**

GGTACTCTATCCCTTATGTAAGG  
GGTACTCTAT-----TGTAAGG  
GGTACTCTAT-----ATGTAAGG

**RN17 GAS-S2 (-10/-6)**

GGTACTCTATCCCTTATGTAAGG  
GGTACTCT-----TAAGG  
GGTACTCTAT-----TGTAAGG

**RN17 GAS-S3 (-11/+1)**

GGTACTCTATCCCTTATATAAGG  
GGTACTCT-----AAGG  
GGTACTCTATCCCTTAATAAGG

**RN17 GAS-L (-8/-9)**

GGTACTCTATCTCTTATGTAAGG  
GGTACTCT-----TGTAAGG  
GGTACTCT-----GTAAGG

**PL6 GAS-S1 (-1/-1)**

GGTACTCTATCCCTTATGTAAGG  
GGTACTCTATCCCTTAT-TAAGG  
GGTACTCTATCCCTTAT-TAAGG

**PL6 GAS-S2 (-4/-4)**

GGTACTCTATCCCTTATGTAAGG  
GGTACTCTATCCC---GTAAGG  
GGTACTCTATCCC---GTAAGG

**PL6 GAS-S3 (-2/-11)**

GGTACTCTATCCCTTATATAAGG  
GGTACTCTATCCCTT-ATAAGG  
GGTACT-----ATAAGG

**PL6 GAS-L (-1/-5)**

GGTACTCTATCTCTTATGTAAGG  
GGTACTCTATCT----GTAAGG  
GGTACTCTATCTCTTA-GTAAGG

**PL7 GAS-S1 (-3/-3)**

GGTACTCTATCCCTTATGTAAGG  
GGTACTCTATCCCT---GTAAGG  
GGTACTCTATCCCT---GTAAGG

**PL7 GAS-S2 (-2/-2)**

GGTACTCTATCCCTTATGTAAGG  
GGTACTCTATCCCTT--GTAAGG  
GGTACTCTATCCCTT--GTAAGG

**PL7 GAS-S3 (-4/-4)**

GGTACTCTATCCCTTATATAAGG  
GGTACTCTATCC----TATAAGG  
GGTACTCTATCC----TATAAGG

**PL7 GAS-L (-5/-5)**

GGTACTCTATCTCTTATGTAAGG  
GGTACTCTATCT----GTAAGG  
GGTACTCTATCT----GTAAGG

Supplementary figure S4

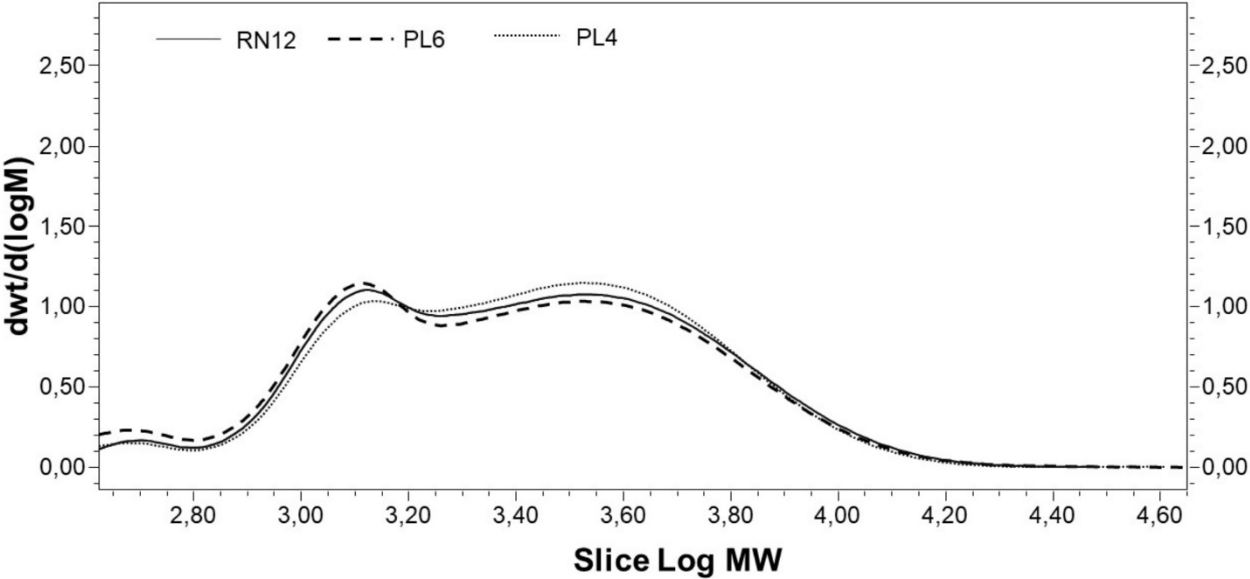

Supplementary figure S5

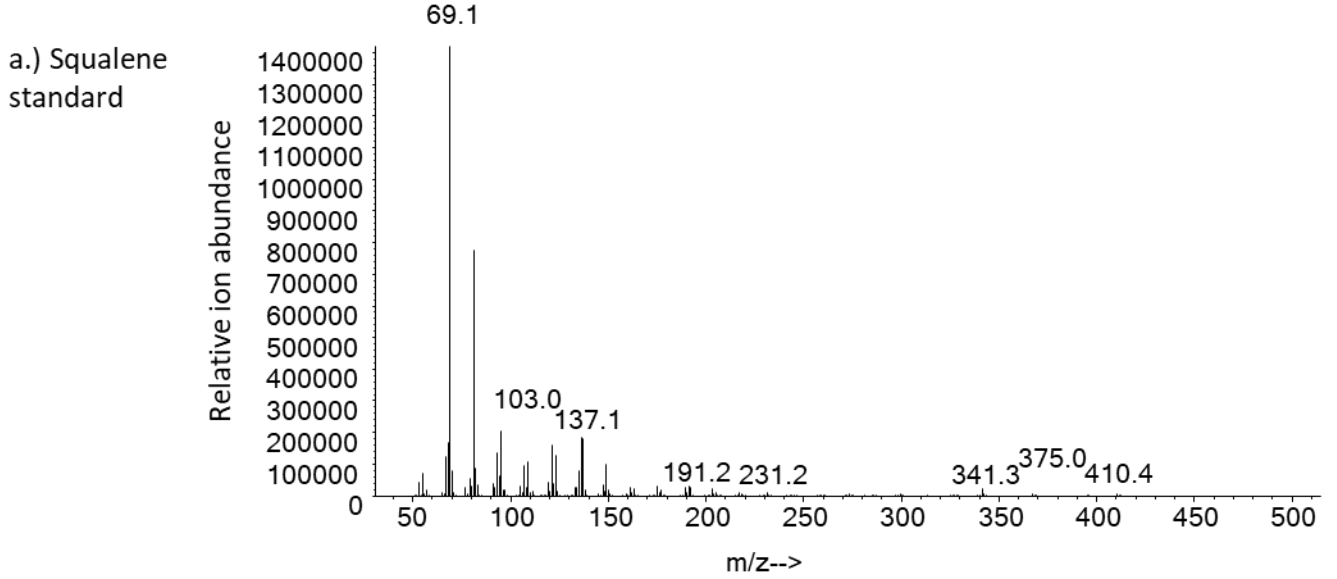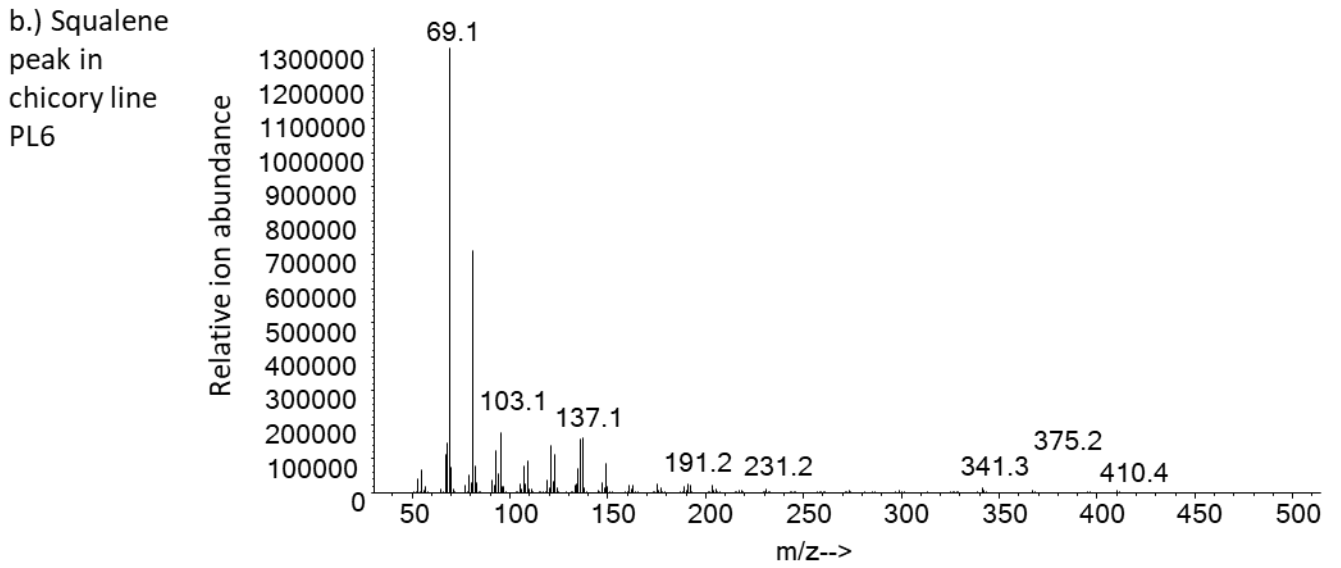



# Supplementary figure S6

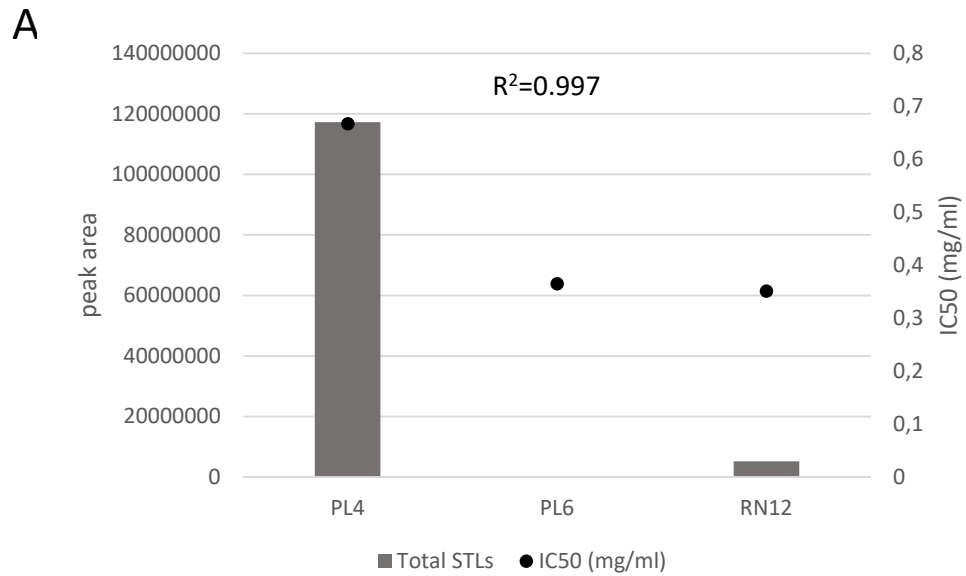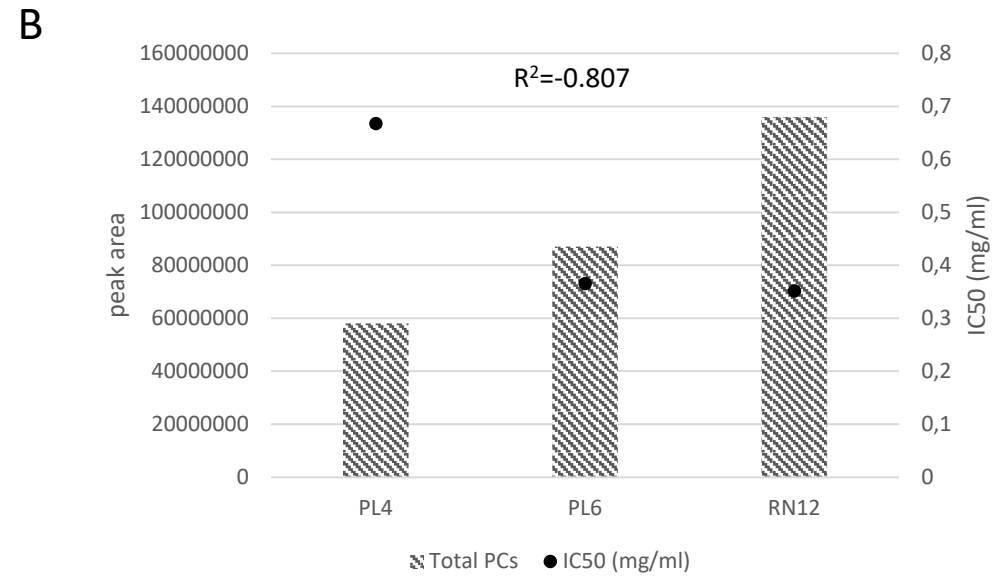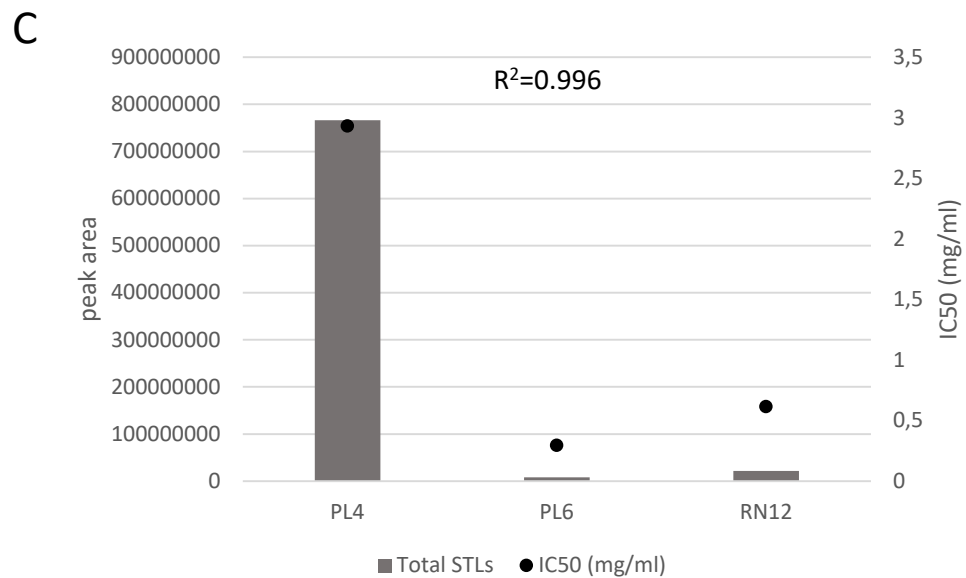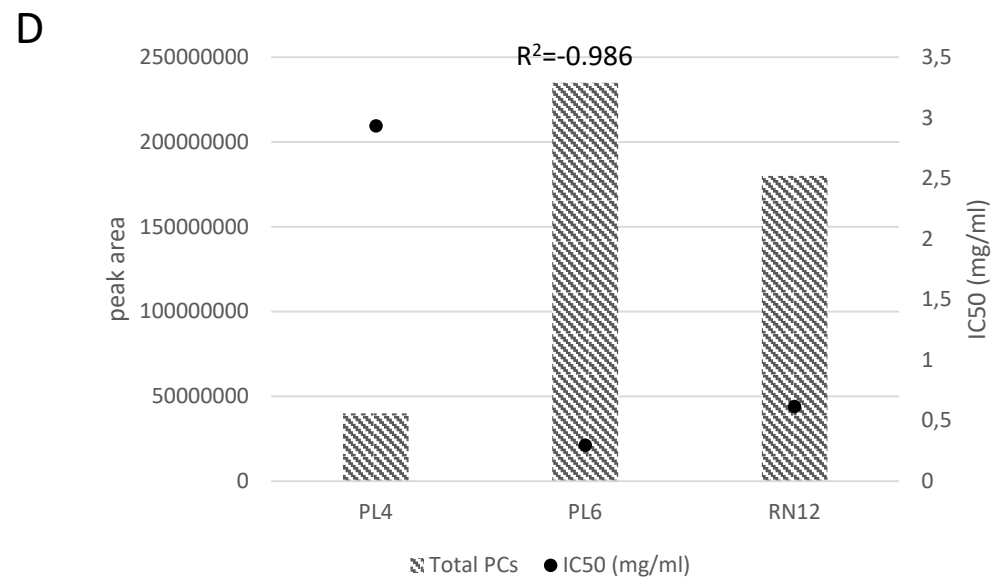

Supplementary table S1: Primers used in this study

| Primer             | Sequence                                            |
|--------------------|-----------------------------------------------------|
| GAS-S1 F           | TGTAAACCGTTGGGCTCGTC                                |
| GAS-S1 R           | GAGTTTATAGCACATGCGT                                 |
| GAS-S2 F           | CTATTAATCGGCTTTGGTCAAC                              |
| GAS-S2 R           | CCATATGGACTCGCTCAAAC                                |
| GAS-S3 F           | GTTATTTTCAGTTCCCCAAGTGT                             |
| GAS-S3 R           | GTGTTTTTGTCCCTATCCGTCT                              |
| GAS-L F            | CGTACGTAGAGTGTCCAA                                  |
| GAS-L R            | CCCCAAAAGAAGCCCAATCC                                |
| GAS-S1/S2 F nested | ACTCTTTCCCTACACGACGCTCTTCCGATCTTATGAGGTTCCAGGAAACTA |
| GAS-S1/S2 R nested | TGGAGTTCAGACGTGTGCTCTTCCGATCTAGGCTCAAAGTACAATCCC    |
| GAS-S3 F nested    | ACTCTTTCCCTACACGACGCTCTTCCGATCTTATGAGGTTCCAAGAAACTA |
| GAS-S3 R nested    | TGGAGTTCAGACGTGTGCTCTTCCGATCTAGGCTCAAAGTACAATCCT    |
| GAS-L F nested     | ACTCTTTCCCTACACGACGCTCTTCCGATCTTATGCAATTCCAACAATCCG |
| GAS-L R nested     | TGGAGTTCAGACGTGTGCTCTTCCGATCTACGGCTCGAAATATAACCCC   |
